1 **Title:** Are we ready to track climate-driven shifts in marine species across international  
2 boundaries? - A global survey of scientific bottom trawl data

3

4 **Authors:** Aurore Maureaud<sup>1,2,\*</sup>, Romain Frelat<sup>3</sup>, Laurène Pécuchet<sup>4</sup>, Nancy Shackell<sup>5</sup>,  
5 Bastien Mérigot<sup>6</sup>, Malin L. Pinsky<sup>7</sup>, Kofi Amador<sup>8</sup>, Sean C. Anderson<sup>9</sup>, Alexander Arkhipkin<sup>10</sup>,  
6 Arnaud Auber<sup>11</sup>, Iça Barri<sup>12</sup>, Rich Bell<sup>13</sup>, Jonathan Belmaker<sup>14</sup>, Esther Beukhof<sup>15</sup>, Mohamed  
7 Lamine Camara<sup>16</sup>, Renato Guevara-Carrasco<sup>17</sup>, Junghwa Choi<sup>18</sup>, Helle Torp Christensen<sup>19</sup>,  
8 Jason Conner<sup>20</sup>, Luis A. Cubillos<sup>21</sup>, Hamet Diaw Diadiou<sup>22</sup>, Dori Edelist<sup>23</sup>, Margrete  
9 Emblemståg<sup>24</sup>, Billy Ernst<sup>25</sup>, Tracey P. Fairweather<sup>26</sup>, Heino O. Fock<sup>27</sup>, Kevin D. Friedland<sup>28</sup>,  
10 Camilo B. Garcia<sup>29</sup>, Didier Gascuel<sup>30</sup>, Henrik Gislason<sup>2</sup>, Menachem Goren<sup>14</sup>, Jérôme  
11 Guitton<sup>30</sup>, Didier Jouffre<sup>6</sup>, Tarek Hattab<sup>6</sup>, Manuel Hidalgo<sup>31</sup>, Johannes N. Kathena<sup>32</sup>, Ian  
12 Knuckey<sup>33</sup>, Saïkou Oumar Kidé<sup>34</sup>, Mariano Koen-Alonso<sup>35</sup>, Matt Koopman<sup>34</sup>, Vladimir Kulik<sup>36</sup>,  
13 Jacqueline Palacios León<sup>18</sup>, Ya'arit Levitt-Barmats<sup>14</sup>, Martin Lindegren<sup>1</sup>, Marcos Llope<sup>37</sup>,  
14 Félix Massiot-Granier<sup>38</sup>, Hicham Masski<sup>39</sup>, Matthew McLean<sup>40</sup>, Beyah Meissa<sup>34</sup>, Laurène  
15 Mérillet<sup>41</sup>, Vesselina Mihneva<sup>42</sup>, Francis K.E. Nunoo<sup>43</sup>, Richard O'Driscoll<sup>44</sup>, Cecilia A.  
16 O'Leary<sup>45</sup>, Elitsa Petrova<sup>43</sup>, Jorge E. Ramos<sup>10,46</sup>, Wahid Refes<sup>47</sup>, Esther Román-Marcote<sup>48</sup>,  
17 Helle Siegstad<sup>20</sup>, Ignacio Sobrino<sup>37</sup>, Jón Sólmundsson<sup>49</sup>, Oren Sonin<sup>50</sup>, Ingrid Spies<sup>51</sup>, Petur  
18 Steingrund<sup>52</sup>, Fabrice Stephenson<sup>44</sup>, Nir Stern<sup>53</sup>, Feriha Tserkova<sup>43</sup>, Georges Tserpes<sup>54</sup>,  
19 Evangelos Tzanatos<sup>55</sup>, Itai van Rijn<sup>56</sup>, Paul A.M. van Zwieten<sup>3</sup>, Paraskevas Vasilakopoulos<sup>57</sup>,  
20 Daniela V. Yepsen<sup>58</sup>, Philippe Ziegler<sup>59</sup>, James Thorson<sup>60</sup>

21

22 \*corresponding author: [aurore.maureaud@gmail.com](mailto:aurore.maureaud@gmail.com)

23

24 <sup>1</sup> Centre for Ocean Life, National Institute of Aquatic Resources (DTU Aqua), Technical  
25 University of Denmark, Kgs. Lyngby, Denmark

26 <sup>2</sup> Section for Ecosystem based Marine Management, National Institute of Aquatic Resources  
27 (DTU Aqua), Technical University of Denmark, Kgs. Lyngby, Denmark

28 <sup>3</sup> Aquaculture and Fisheries Group, Wageningen University & Research, Wageningen, The  
29 Netherlands

- 30 <sup>4</sup> Norwegian College of Fishery Science, UiT The Arctic University of Norway, Tromsø,  
31 Norway  
32 <sup>5</sup> Fisheries and Oceans Canada, Bedford Institute of Oceanography, Dartmouth, NS,  
33 Canada  
34 <sup>6</sup> MARBEC, University of Montpellier, CNRS, Ifremer, IRD, Sète, France  
35 <sup>7</sup> Department of Ecology, Evolution, and Natural Resources, Rutgers, The State University of  
36 New Jersey, New Brunswick, NJ, USA  
37 <sup>8</sup> Fisheries Scientific Survey Division, Fisheries Commission, Tema, Ghana  
38 <sup>9</sup> Fisheries and Oceans Canada, Pacific Biological Station, Nanaimo, BC, Canada.  
39 <sup>10</sup> Falkland Islands Fisheries Department, Directorate of Natural Resources, Stanley,  
40 Falkland Islands  
41 <sup>11</sup> French Research Institute for the Exploitation of the Sea (IFREMER), Halieutique Manche  
42 Mer du Nord unit, Boulogne-sur-Mer, France  
43 <sup>12</sup> Centro de Investigação Pesqueira Aplicada (CIPA), Av. Amílcar Cabral, Bissau 102/72  
44 <sup>13</sup> The Nature Conservancy, Narragansett, RI 02882, USA  
45 <sup>14</sup> School of Zoology and The Steinhardt Museum of Natural History, Israel  
46 <sup>15</sup> Wageningen Marine Research, IJmuiden, Netherlands  
47 <sup>16</sup> Halieute, National Center of Fisheries Sciences of Boussoura, Conakry, Republic of  
48 Guinea  
49 <sup>17</sup> General Directorate of Demersal and Coastal Resources Research, Instituto del Mar Perú  
50 (IMARPE), Perú  
51 <sup>18</sup> Fisheries Resources Research Center, National Institute of Fisheries Science,  
52 Tongyeong-si, Korea  
53 <sup>19</sup> Greenland Institute of Natural Resources, Nuuk, Greenland  
54 <sup>20</sup> Resource Assessment and Conservation Engineering, Alaska Fisheries Science Center,  
55 National Marine Fisheries Service, NOAA, Seattle, WA, USA  
56 <sup>21</sup> COPAS Sur-Austral, Departamento de Oceanografía, University of Concepcion,  
57 Concepción, Chile  
58 <sup>22</sup> Fisheries and Aquaculture Biologist, ISRA, CRODT, Dakar (Senegal)  
59 <sup>23</sup> Recanati Institute for Maritime Studies and Department of Maritime Civilizations, Charney  
60 School of Marine Sciences, University of Haifa, Israel  
61 <sup>24</sup> Møreforsking Ålesund AS, Ålesund, Norway  
62 <sup>25</sup> Millennium Nucleus of Ecology and Sustainable Management of Oceanic Islands (ESMOI),  
63 Departamento de Oceanografía, Facultad de Ciencias Naturales y Oceanográficas,  
64 Universidad de Concepción, Concepción, Chile  
65 <sup>26</sup> Department of Forestry, Fisheries and the Environment, Cape Town, South Africa  
66 <sup>27</sup> Thuenen Institute of Sea Fisheries, Bremerhaven, Germany  
67 <sup>28</sup> National Marine Fisheries Service, Narragansett Laboratory, Narragansett, RI, USA  
68 <sup>29</sup> Departamento de Biología, Universidad Nacional de Colombia, Colombia  
69 <sup>30</sup> ESE, Ecology and ecosystem health, Institut Agro, 35042 Rennes, France  
70 <sup>31</sup> Instituto Español de Oceanografía, Centre Oceanogràfic de les Balears, Ecosystem  
71 Oceanography Group (GRECO), Palma de Mallorca, Spain  
72 <sup>32</sup> National Marine Information and Research Centre, Ministry of Fisheries and Marine  
73 Resources (MFMR), Swakopmund, Namibia  
74 <sup>33</sup> Fishwell Consulting Pty Ltd, Queenscliff, Victoria, Australia  
75 <sup>34</sup> Institut Mauritanien de Recherches Océanographiques et des Pêches, Mauritanie  
76 <sup>35</sup> Northwest Atlantic Fisheries Centre, Fisheries and Oceans Canada, St. John's, NL,  
77 Canada  
78 <sup>36</sup> Pacific branch (TINRO) of Russian Federal Research Institute Of Fisheries and  
79 Oceanography (VNIRO), Vladivostok, Russia  
80 <sup>37</sup> Instituto Español de Oceanografía, Puerto Pesquero, Muelle de Levante, Cádiz,  
81 Andalucía, Spain  
82 <sup>38</sup> Département Adaptations du vivant, UMR BOREA, Museum National d'Histoire Naturelle,  
83 Paris, France  
84 <sup>39</sup> Institut National de Recherche Halieutique, Morocco

- 85 <sup>40</sup> Department of Biology, Dalhousie University, Halifax, Nova Scotia, Canada  
86 <sup>41</sup> National Museum of Natural History, Paris, France and Ifremer, Lorient, France  
87 <sup>42</sup> Institute of Fish Resources, Varna, Bulgaria  
88 <sup>43</sup> Department of Marine and Fisheries Sciences, University of Ghana, Legon, Accra, Ghana  
89 <sup>44</sup> National Institute of Water and Atmospheric Research Limited, Wellington, New Zealand  
90 <sup>45</sup> Resource Assessment and Conservation Engineering Division, Alaska Fisheries Science  
91 Center, NOAA, Seattle, WA, United States  
92 <sup>46</sup> Institute for Marine and Antarctic Studies, University of Tasmania, Hobart, Tasmania,  
93 Australia  
94 <sup>47</sup> National Higher School of Marine Sciences and Coastal Management, Dély Ibrahim,  
95 Algeria  
96 <sup>48</sup> Instituto Español de Oceanografía, Centro Oceanográfico de Vigo, Subida a Radio Faro,  
97 50. 36390, Vigo, Spain  
98 <sup>49</sup> Marine and Freshwater Research Institute, Reykjavik, Iceland  
99 <sup>50</sup> Israeli Fisheries division, Fisheries and Aquaculture Department, Ministry of Agriculture,  
100 Israel  
101 <sup>51</sup> Resource Ecology and Fisheries Management, Alaska Fisheries Science Center, National  
102 Marine Fisheries Service, NOAA, Seattle, WA, USA  
103 <sup>52</sup> Faroe Marine Research Institute, Nóatún 1, FO-100 Tórshavn, Faroe Islands  
104 <sup>53</sup> Israel Oceanographic and Limnological Research Institute, Haifa, Israel  
105 <sup>54</sup> Hellenic Centre for Marine Research (HCMR), PO Box 2214, 71003 Heraklion, Greece  
106 <sup>55</sup> Department of Biology, University of Patras, Rio, Patras, Greece  
107 <sup>56</sup> School of Zoology, Tel Aviv University, Israel  
108 <sup>57</sup> Joint Research Centre (JRC), European Commission, Ispra, Italy  
109 <sup>58</sup> Programa de Doctorado en Ciencias con Mención en Manejo de Recursos Acuáticos  
110 Renovables (MaReA), Facultad de Ciencias Naturales y Oceanográficas, Universidad de  
111 Concepción, Concepción, Chile  
112 <sup>59</sup> Antarctic Conservation and Management Program, Australian Antarctic Division,  
113 Department of Agriculture, Water, and the Environment, Tasmania, Australia  
114 <sup>60</sup> Habitat and Ecological Processes Research Program, Alaska Fisheries Science Center,  
115 National Marine Fisheries Service, NOAA, Seattle, WA, USA

## 116 Abstract

117 Marine biota is redistributing at a rapid pace in response to climate change and shifting  
118 seascapes. While changes in fish populations and community structure threaten the  
119 sustainability of fisheries, our capacity to adapt by tracking and projecting marine species  
120 remains a challenge due to data discontinuities in biological observations, lack of data  
121 availability, and mismatch between data and real species distributions. To assess the extent  
122 of this challenge, we review the global status and accessibility of ongoing scientific bottom  
123 trawl surveys. In total, we gathered metadata for 283,925 samples from 95 surveys  
124 conducted regularly from 2001 to 2019. 59% of the metadata collected are not publicly  
125 available, highlighting that the availability of data is the most important challenge to assess  
126 species redistributions under global climate change. We further found that single surveys do  
127 not cover the full range of the main commercial demersal fish species and that an average of  
128 18 surveys is needed to cover at least 50% of species ranges, demonstrating the importance  
129 of combining multiple surveys to evaluate species range shifts. We assess the potential for  
130 combining surveys to track transboundary species redistributions and show that differences  
131 in sampling schemes and inconsistency in sampling can be overcome with vector  
132 autoregressive spatio-temporal modeling to follow species density redistributions. In light of  
133 our global assessment, we establish a framework for improving the management and  
134 conservation of transboundary and migrating marine demersal species. We provide  
135 directions to improve data availability and encourage countries to share survey data, to  
136 assess species vulnerabilities, and to support management adaptation in a time of climate-  
137 driven ocean changes.

138

139

## 140 Introduction

141 Marine species worldwide are redistributing in response to climate-induced shifting  
142 seascapes, while constrained by physiological features over latitudinal, longitudinal and  
143 bathymetric gradients<sup>1,2</sup>. The movement of individuals and species from one location to  
144 another in response to climate change, either through active migration or passive dispersal  
145 of early life-stages, results in colonizations and potential invasions into previously  
146 unoccupied areas<sup>3,4</sup>. Such redistributions have profound consequences for community  
147 composition and biodiversity, as demonstrated by substantial changes in taxonomic<sup>5-9</sup> and  
148 trait diversity<sup>10-14</sup>. They also affect the structure and functions of marine ecosystems<sup>15-18</sup>.  
149 While species on the move have important socioeconomic consequences<sup>19-22</sup>, our capacity  
150 to adapt to these changes by tracking and projecting species range shifts across regional  
151 boundaries remains a challenge, not only scientifically, but also economically and  
152 politically<sup>23-25</sup>.

153         The capacity to detect species range and community changes in response to climate  
154 variability and change depends foremost on the ability to monitor species through, among  
155 others, the existence, coverage and quality of surveys. There is a broad variety of monitoring  
156 efforts on species distributions and abundances on land and in the oceans<sup>26-28</sup>. Among  
157 them, scientific bottom trawl surveys have been started in the ~1900s and hence collected  
158 demersal marine species (living over and on the sea bottom) on continental shelves and  
159 slopes in many areas of the world<sup>29,30</sup>. The primary purpose of these surveys is to provide  
160 fishery-independent data to inform stock assessment of commercially important species and  
161 populations, and more recently for multidisciplinary ecosystem monitoring. Many of the  
162 surveys offer long and often continuous time-series of data on community composition and  
163 provide a unique opportunity to both track species range shifts within and across  
164 international boundaries and improve the assessment of biodiversity under global change.

165           Studies examining climate change impacts on marine communities across large  
166 regions have mostly focused on the North Atlantic and Northeast Pacific ecosystems<sup>9,31–34</sup>.  
167 This is due to the lack of availability and knowledge on the existence of bottom trawl surveys  
168 elsewhere, but also to fewer surveys and reduced transnational cooperation in the southern  
169 hemisphere compared to the northern hemisphere. While there is a global movement  
170 towards “open science”<sup>35</sup>, particularly by making data publicly available<sup>36–39</sup>, it has also  
171 sparked considerable debate on how to proceed<sup>40,41</sup>. Therefore, the application of open  
172 science principles, making primary outputs of scientific research available and reproducible,  
173 remains a challenge. From a broader political and management perspective, there is a need  
174 to access surveys covering species range across international boundaries to assess species  
175 responses to environmental change because there is an increasing need for transboundary  
176 assessment of commercial species. Particularly, the lack of assessment of species range  
177 shifts across international boundaries and management areas may lead to political disputes  
178 on shifting fisheries resources<sup>24,42–44</sup>. If the data generated by bottom trawl surveys are  
179 available—combined and modeled properly—they may allow comparisons of species  
180 distribution and abundance in time and space. This can offer the opportunity to quantitatively  
181 monitor the dynamics of species distributions and community structure by following the  
182 different stages of species redistribution and mechanisms through which communities are  
183 altered by climate and anthropogenic stressors<sup>45</sup>. Developing knowledge on marine species  
184 responses to climate change is the first step towards developing transboundary and  
185 international management plans.

186           To uncover the difficulties preventing a global assessment of marine species  
187 redistributions, we first review the existence and availability of bottom trawl surveys  
188 worldwide by collecting survey metadata. We assess the global coverage of productive and  
189 trawled seas by bottom trawl surveys. Second, we show the importance of combining  
190 surveys to cover commercial species range. Third, we demonstrate that modelling can  
191 incorporate multiple surveys and unbalanced sampling to follow species density in time and

192 space. We propose a framework where open science would help to support transboundary  
193 management and conservation.

194

## 195 Global availability of trawl survey data

196 Scientific bottom trawl surveys have been conducted in many countries to sample  
197 continental shelves and slopes around the world, inhabited by essential demersal fisheries  
198 resources<sup>46</sup>. They have formed the backbone of information supporting research on marine  
199 fish communities in response to climate change and variability across ecosystems and over  
200 large spatial scales<sup>10,31,47–51</sup>, as well as meta-analysis across taxonomic groups and  
201 biomes<sup>9,34</sup>. However, a single survey sampling demersal communities is typically carried out  
202 nationally, regionally or within a delimited management zone. The monitoring protocol might  
203 differ among surveys, and the resulting data are not always publicly available, creating an  
204 obstacle for assessing potential species range shifts. Determining the consequences of  
205 climate change on marine species critically depends on the availability and quality of the  
206 data<sup>52,53</sup>.

207

208 **Global data synthesis.** To assess the existence and accessibility of fishery-independent  
209 data on demersal species in the global ocean, we collected metadata (latitude, longitude,  
210 and depth if available) from scientific bottom trawl surveys (henceforth surveys) including  
211 samples (hauls) of marine communities. We only collected metadata for recent and ongoing  
212 surveys that included at least one year of sampling since 2015 and use otter trawl gear, the  
213 most widely spread type of trawl to sample demersal communities. In addition, we only  
214 retained the surveys that were performed for four years or more between 2001–2019 and  
215 reported the first year surveyed if it was prior to 2001 (complete list in Supplementary Table  
216 1.1). Finally, we excluded surveys covering near-shore areas (conducted within 3 miles from  
217 the coast) as they are designed to primarily target juvenile or coastal fish. However, we kept  
218 track of all surveys that did not follow our selection criteria (Supplementary Table 2.1).

219           The survey information was gathered and built on knowledge of previously existing  
220 survey collections (<https://datras.ices.dk/>, <https://oceanadapt.rutgers.edu/>, <https://james-thorson.shinyapps.io/FishViz/>) and previous studies using aggregated survey data<sup>29,31,47–51</sup>.  
221  
222 In order to ensure a broad geographical coverage, we sent a standardized query to  
223 established and identified contacts of surveys, particularly where geographical gaps were  
224 identified (South America, Africa, Asia, and Oceania). In case no obvious contact person  
225 was available, we contacted national fisheries institutes. We acknowledge that despite the  
226 rigorous surveying and querying, some surveys might still be missing.

227           For each survey, based on haul coordinates, we estimated the spatial area covered  
228 using an alpha-convex hull method<sup>54</sup>, where we set the parameter controlling for the volume  
229 shape at  $\alpha = 1$ . This allowed the creation of polygons from the location of samples at the  
230 extremes of the surveyed area and a rough estimation of the area covered by surveys.  
231 Overall, available metadata covered 95 surveys across 78 Exclusive Economic Zones  
232 (EEZs) around the world and constitute a total of 283,925 unique geo-referenced hauls from  
233 2001 to 2019 (Figure 1, Supplementary Table 1.1), covering approximately 2,509,000 km<sup>2</sup> in  
234 total.

235

236 **Surveys cover productive and fished continental shelves.** We compared the spatial  
237 extent of the surveys with the area covered by productive continental shelves and the area  
238 fished by bottom trawlers. To estimate the area of productive continental shelves, we used  
239 global depth data (GEBCO <https://www.gebco.net/>) and chlorophyll-a concentration data  
240 (GlobColour GSM, 2005–2015)<sup>55</sup>. The fished area was estimated from bottom trawl fishing  
241 data from Global Fishing Watch for the years 2013 to 2016<sup>56</sup>. The environmental and  
242 fisheries data were aggregated on a grid (0.04°×0.04°). A grid cell was considered as a  
243 productive shelf site if its depth was between 30-500 m and its chlorophyll-a concentration  
244 was higher than 0.5 mg/m<sup>3</sup> (several thresholds tested are shown in Supplementary 3). A grid  
245 cell was counted as fished if more than one trawling activity was detected in the grid cell in



246 the period 2013-2016. Thus, a grid cell could be designated as productive, fished, neither, or  
247 both. We then compared the productive and fished grid cells with the convex hull of surveys  
248 to compute the global proportion of productive shelves and fished areas covered by the  
249 surveys. We estimated that the surveys cover 62% of continental productive seas and 54%  
250 of coastal bottom-trawl fished areas (Supplementary Figure 3.3 and Figure 3.5).

251

252 **Criteria for data accessibility.** The survey metadata were classified based on their relative  
253 degree of accessibility, using the following classification criteria:

254 ● *Publicly available:* data for all years and species sampled were available in a public  
255 repository

256 ● *Partly publicly available:* data only for some years, or only for some species were  
257 available in a public repository and access to full data is possible upon request

258 ● *Available upon request:* data are not publicly available but access to data is possible  
259 upon request. This category was assigned if at least one person not affiliated to the  
260 institution that owns the data obtained the full raw data via request

261 ● *Not publicly available:* when the data, to the best of our knowledge, were not publicly  
262 available, access to data is not possible upon request, but access to metadata is  
263 possible upon request

264 ● *Incomplete metadata:* when the data were not publicly available and we received  
265 access to partial survey metadata via request, or were reconstructed from the  
266 literature

267 ● *Unavailable metadata:* when we are aware of ongoing surveys but did not receive  
268 access to the metadata, and/or were unable to reconstruct the metadata from the  
269 literature

270

271 **Global status of availability.** Among all collected surveys, species abundance/biomass  
272 data from 41% of the survey hauls are *publicly available*, while an additional 31% of the

273 surveys *partly publicly available* or *available upon request* (Figure 1). The remaining 28% of  
274 the surveys are classified as *not publicly available* or have *incomplete metadata* and are  
275 therefore not available. While species range shifts in response to climate change have  
276 occurred across a broad range of aquatic organisms worldwide<sup>2,21,34</sup>, most marine studies  
277 are concentrated in the Northern hemisphere with a majority of surveys located in the North  
278 Atlantic and Northeast Pacific. This can be explained by the geographical coverage of  
279 surveys in the Southern hemisphere, which is considerably more restricted and includes  
280 almost exclusively not publicly available data, except for South Africa, Chile, New Zealand,  
281 Falkland Islands and Kerguelen Islands (classified as *partly publicly available* and *available*  
282 *upon request*, Figure 1a,b). Lower transnational collaboration within Regional Fisheries  
283 Management Organizations (RMFOs) in the southern hemisphere may explain this  
284 difference in availability. While our international review of the coverage and accessibility of  
285 scientific surveys shows that surveys are regularly conducted across continental shelf seas  
286 worldwide (78 EEZs), a vast majority of the publicly available data are located in Europe and  
287 North America (Figure 1c).

288

289 **Need for improving data availability.** The dominance of Northern hemisphere climate  
290 change studies has been specifically criticized<sup>32,34,57,58</sup>. The under-representation of tropical  
291 seas, polar areas and southern hemisphere studies may mislead our knowledge of demersal  
292 communities' response to global change. The non-availability of data can be, among many  
293 other factors, driven by lack of human and/or logistical resources and capacity to maintain  
294 data management systems, or by institutional incentives controlling data access.  
295 Furthermore, the difficulty and inability to obtain even metadata from established contacts of  
296 current, known surveys, might illustrate that the location of sampling is considered as  
297 sensitive, likely from a political and economic perspective. We provide here the most  
298 exhaustive assessment of ongoing bottom trawl surveys metadata around the world, and  
299 provide information on who owns the data and where it can be requested, aiming at  
300 enhancing data sharing (Box. 1).

301           There are many documented cases where disagreements regarding fishing rights  
302 have led to serious international conflicts<sup>44,59</sup>. Improved science regarding range shifts  
303 across regional boundaries, their impacts on fisheries and fishing communities<sup>22,43,60</sup>, as well  
304 as political and regulation landscapes<sup>19,61,62</sup>, could lead to better planning for contingencies  
305 regarding climate-driven distribution shifts<sup>24</sup>. This would provide scientific information to  
306 design adaptation and management measures that anticipate potential international  
307 conflicts. We therefore argue that financial or political incentives should be identified to better  
308 share the existing data, and develop good data management systems<sup>63</sup>. However, benefits  
309 from sharing data are diffuse, while their costs (in terms of lost publication opportunities for  
310 local teams) are concentrated<sup>63</sup>, and this leads to the well-known “concentrated-diffuse”  
311 mechanism for policy failure<sup>64</sup>. This type of policy failure can be partly overcome by  
312 concentrating scattered incentives, either by providing multilateral forums where many  
313 scientists can jointly benefit from data sharing (e.g. North Pacific Marine Science  
314 Organization, <https://meetings.pices.int/>, International Council for the Exploration of the Sea,  
315 <https://www.ices.dk/>, RFMOs) or by bilateral data-sharing agreements<sup>65</sup>. The movement  
316 towards publicly available and accessible data in science can lead to a lack of recognition of  
317 the source, devaluation of essential investments such as data collection, preparation and  
318 curation<sup>63</sup>. As a result, it remains hard to enhance public availability of data. Publishing data,  
319 following FAIR principles (Findable, Accessible, Interoperable and Reusable,  
320 <https://www.go-fair.org/fair-principles/>) as well as open science principles, could ultimately  
321 increase the visibility of surveys but will face the challenges of thoughtfully use the data by  
322 prioritizing the need of and give credit to the data providers<sup>52</sup> (Box. 1).

323

324

## 325 Species range covered by surveys

326 Studies quantifying species range shifts often assume that surveys are  
327 representative of species' native range<sup>3,4,66,67</sup> when in fact species' ranges may extend well  
328 beyond the monitored area. Demersal fish habitats are often only partially covered by  
329 surveys, particularly since surveys are designed to sample soft bottoms on primarily shallow  
330 continental shelves, hence excluding hard bottoms and reefs. In addition, most of the  
331 surveys are limited by depth, sampling the continental shelves but rarely the slopes at  
332 greater depths. Moreover, ecosystems beyond national jurisdiction are often excluded. To  
333 assess the percentage of species range covered by current surveys, and to evaluate the  
334 probability of species range shifts to occur beyond surveyed areas, we compared the habitat  
335 from species distribution models to the areas covered by the surveys.

336 To estimate the extent to which existing surveys cover species distribution range, we  
337 selected the top three demersal species with the highest commercial catch in each of twelve  
338 main FAO fishing areas from FishStats<sup>68</sup> (a platform reporting annual fisheries catch per  
339 fishing zone, <http://www.fao.org/fishery/statistics/software/fishstat/>), defined as the average  
340 catch over 2001–2019. We ended up studying 37 demersal species (with some species  
341 covering several FAO areas). For the commercial species identified, we downloaded the  
342 native range from AquaMaps<sup>69</sup>, which shows the probability of occurrence of each species  
343 on a 0.5°×0.5° grid. We used the modeled native range and considered it as the “true”  
344 habitat and species range. The habitat in AquaMaps is based on publicly available global  
345 occurrence data and expert judgment on species environmental niches. Even though  
346 AquaMaps may sometimes misrepresent species ranges because of poor occurrence data  
347 and lack of knowledge for some species<sup>70</sup>, the ranges of the selected commercial species  
348 are generally well documented. The preferred habitat data layer of each commercial species  
349 for the analysis was defined as all locations from the AquaMaps habitat maps where the  
350 probability of occurrence was higher than 0.5 (more details in Supplementary 5).

351           Next, we calculated the percentage of grid cells from the AquaMaps commercial  
352 species habitat area covered by the survey footprints, showing the overlap between the two  
353 across all FAO fishing areas. We also included the availability status of surveys. We  
354 demonstrate that no combination of available surveys covers the entire range of any single  
355 species (Figure 2). Nevertheless, for about a quarter of the species considered, existing  
356 surveys cover more than 50% of the species habitats, up to a maximum of 79% for Atlantic  
357 cod (*Gadus morhua*). However, even for these well-surveyed species, the surveys are  
358 sometimes not available (MVO, *Lophius vomerinus* and HKK, *Merluccius capensis* in  
359 Southeast Atlantic and South Africa) or only a part are *publicly available* (PCO, *Gadus*  
360 *macrocephalus* and ALK, *Gadus chalcogrammus* in the North Pacific). We computed the  
361 number of surveys that overlapped with the species native range and show that the number  
362 needed to cover at least 50% of the main commercial species habitat is highly variable (from  
363 4 to 31, average of 18, Figure 2b) and depends on the areas covered by each survey. The  
364 restricted spatial extent of some surveys conducted in Europe explains why more than 15  
365 surveys may be needed to cover 50% of a specific species range, emphasizing the need for  
366 standardizing surveys and developing tools to combine data from different surveys.

367

## 368 Tracking species densities across management areas

369 We have shown that demersal fish ranges and habitats are not fully covered by bottom trawl  
370 surveys, which may be particularly problematic when fisheries stocks and populations are  
371 transboundary. The capacity to track such transboundary species throughout their range  
372 critically depends on the ability to combine surveys from multiple sources and regions.

373           In cases where data are available and gathered from different sources, formatting,  
374 language differences and lack of user expertise on the survey itself may limit the ability to  
375 use the data appropriately. For instance, information on units, haul duration or swept area

376 estimates are sometimes lacking, limiting the combined use of multiple independent surveys.  
377 In addition, differences in gear, sampling designs, species identification procedures and  
378 catchability across and within surveys may bias perceptions of species distribution and  
379 regional changes in abundance<sup>71</sup>. In order to standardize processing of such data, we  
380 recommend improving the availability of survey documentation, including explanations of  
381 survey methodology and associated coding that can be freely applied to clean, standardize,  
382 and combine surveys (Box. 1). Making expert knowledge easily accessible will facilitate  
383 studies combining multiple surveys<sup>72</sup>.

384

385 **A case study to combine surveys across regions.** We used arrowtooth flounder  
386 (*Atheresthes stomias*) to illustrate how to combine survey data across multiple regions when  
387 tracking and investigating population-scale range shifts in species distribution. Arrowtooth  
388 flounder is a widespread and ecologically important predator in the Northeast Pacific<sup>73</sup>,  
389 monitored and assessed by 10 distinct but contiguous surveys across the region from the  
390 California Current to the Bering Sea between 2001 and 2018. To predict densities within the  
391 entire survey domain, we fit a spatio-temporal Poisson-link delta-gamma model<sup>74</sup> to biomass  
392 data from each survey using the R-package VAST<sup>71,75</sup> (vector autoregressive spatio-  
393 temporal). This model has the advantage of interpolating density across time and space  
394 within the survey domain when survey data are lacking in a given area or time step (see  
395 Supplementary 6). We assumed that each survey has identical gear performance (i.e.  
396 catches the same proportion of individuals within the area-swept by bottom trawl gear). The  
397 validated model shows that the highest densities of arrowtooth flounder are observed in the  
398 center of distribution within the Gulf of Alaska (Figure 3). However, densities have recently  
399 increased in the eastern Bering Sea and the distribution has shifted inshore and northward.  
400 Simultaneously, its distribution has slightly moved southward in the California Current.  
401 Despite this expansion at both ends of its range, the centroid of the population shows a net  
402 change northward by 40 km in less than 20 years (Figure 3c).

403

404 **Improving the management of transboundary species.** The use and coordination of  
405 multiple surveys is needed to monitor commercially important species distributions that  
406 extend beyond a singular survey. Our case study and other recent studies<sup>76–79</sup> show that  
407 statistical tools to reconstruct species densities across surveys is possible, and can  
408 appropriately quantify the changes of densities through time and across regions by  
409 correcting for unbalanced sampling<sup>71,75</sup>. The multiple-survey approach—applied here to the  
410 arrowtooth flounder—is applicable for many other wide-ranging species, including  
411 commercially important transboundary species such as Greenland halibut<sup>80</sup>, Pacific cod<sup>81</sup>  
412 and Atlantic cod<sup>67,82</sup>. For each of these species, combining surveys will require initial  
413 research to determine the most appropriate methods to account for differences in  
414 catchability between surveys, species and sites<sup>75,83–85</sup>. For example, this could be done by  
415 using regression-discontinuity-designs to estimate catchability ratios for surveys that are  
416 contiguous, but not overlapping. Furthermore, ongoing efforts to standardize national  
417 surveys will also help to combine surveys. For instance, Russia and Norway started a joint  
418 ecosystem-wide survey in the Barents Sea instead of conducting them separately<sup>86</sup>. This is  
419 also the case of the MEDITS program, ensuring consistent sampling protocol across EU  
420 regions of the Mediterranean Sea<sup>87</sup>. Such intercalibration of different survey schemes and  
421 sampling designs will improve long-term intercomparison of surveys and will help assess  
422 marine species range shifts under global warming. Our knowledge of species redistribution  
423 across surveys will clearly benefit from long-term consistent surveys, when combined and  
424 modeled appropriately.

425 Long-term global monitoring datasets are essential to develop transboundary  
426 science, and offer opportunities to improve the management and conservation of migrating  
427 transboundary species (Box. 2). Under global change, migrating species create a potential  
428 for economic and political conflicts<sup>88</sup>, and may lead to species overexploitation or collapse in  
429 the case of lack of adaptation and cooperation<sup>24,89–92</sup>. The 1982 United Nations Convention  
430 on the Law of the Sea (UNCLOS) provides the legal framework for international obligations

431 towards safeguarding marine resources. Migratory and transboundary stocks are principally  
432 managed by RFMOs<sup>92-94</sup>, or conservation-related initiatives such as the Global  
433 Transboundary Conservation Network (<http://www.tbpa.net/>). Still, these organizations need  
434 to explicitly consider governance in the context of climate change<sup>90,94,95</sup>. While building a  
435 common understanding of status and trends is a key first step towards transboundary  
436 cooperation<sup>24</sup>, international governance will require global geopolitical flexibility and the  
437 establishment of transnational agreements<sup>96,97</sup>, which need to be supported by cross-  
438 boundary open science (Box. 1 and Box. 2). The adaptation of management and policy is  
439 essential for the sustainability and conservation of shared resources, but are often motivated  
440 by economic and cultural values rather than ecological considerations<sup>96</sup>. Scientifically-  
441 supported transboundary governance will avoid overexploitation, conflicts about newly or  
442 historically shared resources and conservation of vulnerable species. The identification of  
443 priority areas, vulnerable transboundary species and capacity for adaptation is essential to  
444 initiate fast and efficient governance of 'biodiversity beyond national jurisdictions'<sup>98-100</sup>.

445

## 446 Maintaining surveys to face future challenges in the 447 oceans

448 Regular bottom trawl surveys do not cover the entire global ocean nor the whole continental  
449 shelves and the lack of monitoring makes it problematic to track ecosystem change and  
450 adapt management and policy to shifting resources<sup>23</sup>. A range of alternative approaches  
451 could be considered to better cover demersal species habitats, understand changes in  
452 spatial distribution under global change, and promote an ecosystem approach to fisheries  
453 and other human activities management. Such alternatives could include both citizen  
454 science initiatives reporting species observed well outside their known ranges (e.g. the  
455 Range Extension Database and Mapping project; Redmap<sup>101</sup> <https://www.redmap.org.au/>  
456 and the European Alien Species Information; EASIN<sup>102</sup> <https://easin.jrc.ec.europa.eu/easin>)



457 as well as formal fishery-dependent data (such as observer, landings, vessel trip report data)  
458 able to report species occurrences and abundances. Other promising sources of data could  
459 be derived from environmental DNA<sup>103</sup>. Datasets derived from such alternative sources can  
460 improve evidence of range shifts, particularly in poorly sampled areas.

461 Bottom trawl surveys are highly valuable for following marine species redistribution  
462 and biodiversity change. However, maintaining surveys in a consistent way through time is a  
463 challenge as they are costly and require political agreements. However, ecological time  
464 series become more informative the longer their timespan, highlighting the need to maintain  
465 long-term monitoring programs<sup>53,104</sup>. The existence of international programs such as the  
466 Nansen program (<http://www.fao.org/in-action/eaf-nansen/en/>) is valuable to inform  
467 ecosystem-based management<sup>105,106</sup> and could be expanded, assuming that the data  
468 collected become available. Bottom trawl surveys impact seafloor habitat, benthic  
469 communities, and sampled fish<sup>29</sup> and we should ensure that this kind of monitoring benefits  
470 science as much as possible. Surveys provide relevant and essential information for  
471 fisheries management and marine ecology, but they must be designed to be as efficient as  
472 possible by sharing (meta)data, providing opportunities for innovative uses of the data and  
473 improve the economic and ecological efficiency of monitoring. In any case, challenges of  
474 sampling marine communities and sharing data need to be overcome to allow scientific  
475 assessment and adequate management of shifting marine resources.

476

## 477 Conclusions

478 The concentration of marine studies in the Northern hemisphere profoundly limits not only  
479 our ability to track and understand climate change effects and species range shifts, but also  
480 our capacity to adapt, mitigate or avoid potential conflicts and socio-economic consequences  
481 that follow. This is particularly important in parts of the developing world where fisheries  
482 constitute a primary source of food and livelihood for coastal communities, but information

483 supporting management is often scarce or non-existing. To alleviate these issues, a  
484 coherent framework to monitor, understand and inform sound and scientifically underpinned  
485 management actions to adapt to species range shifts is needed. Our study provides a first  
486 step towards creating such a framework by conducting a joint and internationally coordinated  
487 synthesis of the global coverage and availability of survey data, and it will be of great  
488 assistance to various users aiming to assess and predict the response of marine biodiversity  
489 to climate change. Our study has identified important gaps in data availability and  
490 accessibility, and suggested ways to make the best use of surveys at hand by combining  
491 data from multiple sources to assess species redistributions over multiple management  
492 areas. In order to support comparative studies on species range shifts, we stress the need  
493 for nations to strengthen monitoring efforts, particularly in under sampled areas of the world.  
494 Moreover, we make a general plea for open science as well as fair and transparent sharing  
495 of data. This is needed to support scientific advice on coordinated spatial management  
496 actions, allowing us to adapt and prepare for the inevitable ecological and socio-economic  
497 consequences of climate change yet to come.

498

## 499 References

- 500 1. Pinsky, M. L., Eikeset, A. M., McCauley, D. J., Payne, J. L. & Sunday, J. M. Greater  
501 vulnerability to warming of marine versus terrestrial ectotherms. *Nature* **569**, 108–111  
502 (2019).
- 503 2. Poloczanska, E. S. *et al.* Global imprint of climate change on marine life. *Nat. Clim.*  
504 *Change* **3**, 919–925 (2013).
- 505 3. Dulvy, N. K. *et al.* Climate change and deepening of the North Sea fish assemblage: a  
506 biotic indicator of warming seas. *J. Appl. Ecol.* **45**, 1029–1039 (2008).
- 507 4. Perry, A. L. Climate Change and Distribution Shifts in Marine Fishes. *Science* **308**, 1912–  
508 1915 (2005).

- 509 5. Batt, R. D., Morley, J. W., Selden, R. L., Tingley, M. W. & Pinsky, M. L. Gradual changes  
510 in range size accompany long-term trends in species richness. *Ecol. Lett.* **20**, 1148–1157  
511 (2017).
- 512 6. Fossheim, M. *et al.* Recent warming leads to a rapid borealization of fish communities in  
513 the Arctic. *Nat. Clim. Change* **5**, 673–677 (2015).
- 514 7. Magurran, A. E., Dornelas, M., Moyes, F., Gotelli, N. J. & McGill, B. Rapid biotic  
515 homogenization of marine fish assemblages. *Nat. Commun.* **6**, 8405 (2015).
- 516 8. Hiddink, J. G. & ter Hofstede, R. Climate induced increases in species richness of marine  
517 fishes. *Glob. Change Biol.* **14**, 453–460 (2008).
- 518 9. Antão, L. H. *et al.* Temperature-related biodiversity change across temperate marine and  
519 terrestrial systems. *Nat. Ecol. Evol.* 1–7 (2020) doi:10.1038/s41559-020-1185-7.
- 520 10. Burrows, M. T. *et al.* Ocean community warming responses explained by thermal  
521 affinities and temperature gradients. *Nat. Clim. Change* **9**, 959–963 (2019).
- 522 11. Dencker, T. S. *et al.* Temporal and spatial differences between taxonomic and trait  
523 biodiversity in a large marine ecosystem: Causes and consequences. *PLOS ONE* **12**,  
524 e0189731 (2017).
- 525 12. McLean, M. *et al.* A Climate-Driven Functional Inversion of Connected Marine  
526 Ecosystems. *Curr. Biol.* **28**, 3654-3660.e3 (2018).
- 527 13. McLean, M. J., Mouillot, D., Goascoz, N., Schlaich, I. & Auber, A. Functional  
528 reorganization of marine fish nurseries under climate warming. *Glob. Change Biol.* **25**,  
529 660–674 (2019).
- 530 14. Frainer, A. *et al.* Climate-driven changes in functional biogeography of Arctic marine  
531 fish communities. *Proc. Natl. Acad. Sci.* **114**, 12202–12207 (2017).
- 532 15. Friedland, K. D. *et al.* Changes in higher trophic level productivity, diversity and niche  
533 space in a rapidly warming continental shelf ecosystem. *Sci. Total Environ.* **704**, 135270  
534 (2020).

- 535 16. Kortsch, S., Primicerio, R., Fossheim, M., Dolgov, A. V. & Aschan, M. Climate  
536 change alters the structure of arctic marine food webs due to poleward shifts of boreal  
537 generalists. *Proc. R. Soc. B Biol. Sci.* **282**, 20151546 (2015).
- 538 17. Pinsky, M. L., Selden, R. L. & Kitchel, Z. J. Climate-Driven Shifts in Marine Species  
539 Ranges: Scaling from Organisms to Communities. *Annu. Rev. Mar. Sci.* **12**, 153–179  
540 (2020).
- 541 18. Mérillet, L., Kopp, D., Robert, M., Mouchet, M. & Pavoine, S. Environment outweighs  
542 the effects of fishing in regulating demersal community structure in an exploited marine  
543 ecosystem. *Glob. Change Biol.* **26**, 2106–2119 (2020).
- 544 19. Dubik, B. A. *et al.* Governing fisheries in the face of change: Social responses to  
545 long-term geographic shifts in a U.S. fishery. *Mar. Policy* **99**, 243–251 (2019).
- 546 20. Greenan, B. J. W. *et al.* Climate Change Vulnerability of American Lobster Fishing  
547 Communities in Atlantic Canada. *Front. Mar. Sci.* **6**, (2019).
- 548 21. Pecl, G. T. *et al.* Biodiversity redistribution under climate change: Impacts on  
549 ecosystems and human well-being. *Science* **355**, (2017).
- 550 22. Pinsky, M. L. & Fogarty, M. Lagged social-ecological responses to climate and range  
551 shifts in fisheries. *Clim. Change* **115**, 883–891 (2012).
- 552 23. Lindegren, M. & Brander, K. Adapting Fisheries and Their Management To Climate  
553 Change: A Review of Concepts, Tools, Frameworks, and Current Progress Toward  
554 Implementation. *Rev. Fish. Sci. Aquac.* **26**, 400–415 (2018).
- 555 24. Pinsky, M. L. *et al.* Preparing ocean governance for species on the move. *Science*  
556 **360**, 1189–1191 (2018).
- 557 25. Ramesh, N., Rising, J. A. & Oremus, K. L. The small world of global marine fisheries:  
558 The cross-boundary consequences of larval dispersal. *Science* **364**, 1192–1196 (2019).
- 559 26. Dornelas, M. *et al.* BioTIME: A database of biodiversity time series for the  
560 Anthropocene. *Glob. Ecol. Biogeogr.* **27**, 760–786 (2018).
- 561 27. Blowes, S. A. *et al.* The geography of biodiversity change in marine and terrestrial  
562 assemblages. *Science* **366**, 339–345 (2019).

- 563 28. Edgar, G. J. *et al.* Abundance and local-scale processes contribute to multi-phyla  
564 gradients in global marine diversity. *Sci. Adv.* **3**, e1700419 (2017).
- 565 29. Trenkel, V. M. *et al.* We can reduce the impact of scientific trawling on marine  
566 ecosystems. *Mar. Ecol. Prog. Ser.* **609**, 277–282 (2019).
- 567 30. Garces, L. R. *et al.* A regional database management system—the fisheries resource  
568 information system and tools (FiRST): Its design, utility and future directions. *Fish. Res.*  
569 **78**, 119–129 (2006).
- 570 31. Pinsky, M. L., Worm, B., Fogarty, M. J., Sarmiento, J. L. & Levin, S. A. Marine Taxa  
571 Track Local Climate Velocities. *Science* **341**, 1239–1242 (2013).
- 572 32. Richardson, A. J. *et al.* Climate change and marine life. *Biol. Lett.* **8**, 907–909 (2012).
- 573 33. Shackell, N. L., Ricard, D. & Stortini, C. Thermal Habitat Index of Many Northwest  
574 Atlantic Temperate Species Stays Neutral under Warming Projected for 2030 but  
575 Changes Radically by 2060. *PLOS ONE* **9**, e90662 (2014).
- 576 34. Lenoir, J. *et al.* Species better track the shifting isotherms in the oceans than on  
577 lands. <http://biorxiv.org/lookup/doi/10.1101/765776> (2019) doi:10.1101/765776.
- 578 35. OCDE. Making Open Science a Reality. (2015)  
579 doi:<https://doi.org/10.1787/5jrs2f963zs1-en>.
- 580 36. Nosek, B. A. *et al.* Promoting an open research culture. *Science* **348**, 1422–1425  
581 (2015).
- 582 37. Cheruvilil, K. S. & Soranno, P. A. Data-Intensive Ecological Research Is Catalyzed  
583 by Open Science and Team Science. *BioScience* **68**, 813–822 (2018).
- 584 38. Poisot, T., Bruneau, A., Gonzalez, A., Gravel, D. & Peres-Neto, P. Ecological Data  
585 Should Not Be So Hard to Find and Reuse. *Trends Ecol. Evol.* **34**, 494–496 (2019).
- 586 39. Gallagher, R. V. *et al.* Open Science principles for accelerating trait-based science  
587 across the Tree of Life. *Nat. Ecol. Evol.* 1–10 (2020) doi:10.1038/s41559-020-1109-6.
- 588 40. Moles, A., Dickie, J. & Flores-Moreno, H. A response to Poisot et al.: Publishing your  
589 dataset is not always virtuous. *Ideas Ecol. Evol.* **6**, (2013).

- 590 41. Poisot, T., Mounce, R. & Gravel, D. Moving toward a sustainable ecological science:  
591 don't let data go to waste! *Ideas Ecol. Evol.* **6**, (2013).
- 592 42. Baudron, A. R. *et al.* Changing fish distributions challenge the effective management  
593 of European fisheries. *Ecography* **42**, 1–12 (2020).
- 594 43. Shackell, N. L., Frank, K. T., Nye, J. A. & den Heyer, C. E. A transboundary dilemma:  
595 dichotomous designations of Atlantic halibut status in the Northwest Atlantic. *ICES J. Mar.*  
596 *Sci.* **73**, 1798–1805 (2016).
- 597 44. Spijkers, J. & Boonstra, W. J. Environmental change and social conflict: the northeast  
598 Atlantic mackerel dispute. *Reg. Environ. Change* **17**, 1835–1851 (2017).
- 599 45. Bates, A. E. *et al.* Defining and observing stages of climate-mediated range shifts in  
600 marine systems. *Glob. Environ. Change* **26**, 27–38 (2014).
- 601 46. *Meeting the sustainable development goals.* (2018).
- 602 47. Beukhof, E. *et al.* Marine fish traits follow fast-slow continuum across oceans. *Sci.*  
603 *Rep.* **9**, 1–9 (2019).
- 604 48. Branch, T. A. *et al.* The trophic fingerprint of marine fisheries. *Nature* **468**, 431–435  
605 (2010).
- 606 49. Pecuchet, L. *et al.* From traits to life-history strategies: Deconstructing fish  
607 community composition across European seas. *Glob. Ecol. Biogeogr.* **26**, 812–822  
608 (2017).
- 609 50. Shin, Y.-J., Rochet, M.-J., Jennings, S., Field, J. G. & Gislason, H. Using size-based  
610 indicators to evaluate the ecosystem effects of fishing. *ICES J. Mar. Sci.* **62**, 384–396  
611 (2005).
- 612 51. Gislason, H. *et al.* Species richness in North Atlantic fish: Process concealed by  
613 pattern. *Glob. Ecol. Biogeogr.* [geb.13068](https://doi.org/10.1111/geb.13068) (2020) doi:10.1111/geb.13068.
- 614 52. Costello, M. J., Michener, W. K., Gahegan, M., Zhang, Z.-Q. & Bourne, P. E.  
615 Biodiversity data should be published, cited, and peer reviewed. *Trends Ecol. Evol.* **28**,  
616 454–461 (2013).

- 617 53. Schindler, D. E. & Hilborn, R. Prediction, precaution, and policy under global change.  
618 *Science* **347**, 953–954 (2015).
- 619 54. Pateiro López, B. & Rodriguez-Casal, A. alphahull: Generalization of the Convex Hull  
620 of a Sample of Points in the Plane. R package version 2.2. (2019).
- 621 55. Maritorena, S., d’Andon, O. H. F., Mangin, A. & Siegel, D. A. Merged satellite ocean  
622 color data products using a bio-optical model: Characteristics, benefits and issues.  
623 *Remote Sens. Environ.* **114**, 1791–1804 (2010).
- 624 56. Kroodsma, D. A. *et al.* Tracking the global footprint of fisheries. *Science* **359**, 904–  
625 908 (2018).
- 626 57. Lenoir, J. & Svenning, J.-C. Climate-related range shifts – a global multidimensional  
627 synthesis and new research directions. *Ecography* **38**, 15–28 (2015).
- 628 58. Feeley, K. J., Stroud, J. T. & Perez, T. M. Most ‘global’ reviews of species’ responses  
629 to climate change are not truly global. *Divers. Distrib.* **23**, 231–234 (2017).
- 630 59. Guðmundsson, G. J. The Cod and the Cold War. *Scand. J. Hist.* **31**, 97–118 (2006).
- 631 60. Young, T. *et al.* Adaptation strategies of coastal fishing communities as species shift  
632 poleward. *ICES J. Mar. Sci.* **76**, 93–103 (2019).
- 633 61. Cheung, W. W. L., Pinnegar, J., Merino, G., Jones, M. C. & Barange, M. Review of  
634 climate change impacts on marine fisheries in the UK and Ireland: CLIMATE CHANGE  
635 AND MARINE FISHERIES IN IRELAND AND THE UK. *Aquat. Conserv. Mar. Freshw.*  
636 *Ecosyst.* **22**, 368–388 (2012).
- 637 62. McIlgorm, A. *et al.* How will climate change alter fishery governance? Insights from  
638 seven international case studies. *Mar. Policy* **34**, 170–177 (2010).
- 639 63. Fenichel, E. P. & Skelly, D. K. Why Should Data Be Free; Don’t You Get What You  
640 Pay For? *BioScience* **65**, 541–542 (2015).
- 641 64. Shanahan, E. A., Jones, M. D., McBeth, M. K. & Lane, R. R. An Angel on the Wind:  
642 How Heroic Policy Narratives Shape Policy Realities: Narrative Policy Framework. *Policy*  
643 *Stud. J.* **41**, 453–483 (2013).

- 644 65. Hammer, M. & Hoel, A. H. The Development of Scientific Cooperation under the  
645 Norway–Russia Fisheries Regime in the Barents Sea. *Arct. Rev.* **3**, (2012).
- 646 66. Albouy, C., Guilhaumon, F., Araújo, M. B., Mouillot, D. & Leprieur, F. Combining  
647 projected changes in species richness and composition reveals climate change impacts  
648 on coastal Mediterranean fish assemblages. *Glob. Change Biol.* **18**, 2995–3003 (2012).
- 649 67. Morley, J. W. *et al.* Projecting shifts in thermal habitat for 686 species on the North  
650 American continental shelf. *PLOS ONE* **13**, e0196127 (2018).
- 651 68. FAO. Fisheries and aquaculture software. FishStat Plus - Universal software for  
652 fishery statistical time series.  
653 <http://www.fao.org/fishery/meta:FI:citation/topic/16073/en?url=http%3A//www.fao.org/fishe>  
654 [ry/statistics/software/fishstat/en](http://www.fao.org/fishery/meta:FI:citation/topic/16073/en?url=http%3A//www.fao.org/fishe) (2017).
- 655 69. Kaschner, K. *et al.* AquaMaps: Predicted range maps for aquatic species.  
656 [www.aquamaps.org](http://www.aquamaps.org) (2016).
- 657 70. O'Hara, C. C., Afflerbach, J. C., Scarborough, C., Kaschner, K. & Halpern, B. S.  
658 Aligning marine species range data to better serve science and conservation. *PLOS ONE*  
659 **12**, e0175739 (2017).
- 660 71. Thorson, J. T. & Barnett, L. A. K. Comparing estimates of abundance trends and  
661 distribution shifts using single- and multispecies models of fishes and biogenic habitat.  
662 *ICES J. Mar. Sci.* **74**, 1311–1321 (2017).
- 663 72. Moriarty, M., Greenstreet, Simon. P. R. & Rasmussen, J. Derivation of Groundfish  
664 Survey Monitoring and Assessment Data Products for the Northeast Atlantic Area. *Scott.*  
665 *Mar. Freshw. Sci.* **8**, 240 pp. (2017).
- 666 73. Aydin, K. & Mueter, F. The Bering Sea—A dynamic food web perspective. *Deep Sea*  
667 *Res. Part II Top. Stud. Oceanogr.* **54**, 2501–2525 (2007).
- 668 74. Thorson, J. T. Three problems with the conventional delta-model for biomass  
669 sampling data, and a computationally efficient alternative. *Can. J. Fish. Aquat. Sci.* **75**,  
670 1369–1382 (2017).



- 671 75. Thorson, J. T. Guidance for decisions using the Vector Autoregressive Spatio-  
672 Temporal (VAST) package in stock, ecosystem, habitat and climate assessments. *Fish.*  
673 *Res.* **210**, 143–161 (2019).
- 674 76. Thorson, J. T., Pinsky, M. L. & Ward, E. J. Model-based inference for estimating  
675 shifts in species distribution, area occupied and centre of gravity. *Methods Ecol. Evol.* **7**,  
676 990–1002 (2016).
- 677 77. Selden, R. L. *et al.* Coupled changes in biomass and distribution drive trends in  
678 availability of fish stocks to US West Coast ports. *ICES J. Mar. Sci.* **77**, 188–199 (2020).
- 679 78. Dolder, P. J., Thorson, J. T. & Minto, C. Spatial separation of catches in highly mixed  
680 fisheries. *Sci. Rep.* **8**, 1–11 (2018).
- 681 79. Ono, K., Ianelli, J. N., McGilliard, C. R. & Punt, A. E. Integrating data from multiple  
682 surveys and accounting for spatio-temporal correlation to index the abundance of juvenile  
683 Pacific halibut in Alaska. *ICES J. Mar. Sci.* **75**, 572–584 (2018).
- 684 80. Wheeland, L. J. & Morgan, M. J. Age-specific shifts in Greenland halibut  
685 (*Reinhardtius hippoglossoides*) distribution in response to changing ocean climate. *ICES*  
686 *J. Mar. Sci.* fsz152 (2019) doi:10.1093/icesjms/fsz152.
- 687 81. Drinkwater, K. F. The response of Atlantic cod (*Gadus morhua*) to future climate  
688 change. *ICES J. Mar. Sci.* **62**, 1327–1337 (2005).
- 689 82. Spies, I. *et al.* Genetic evidence of a northward range expansion in the eastern  
690 Bering Sea stock of Pacific cod. *Evol. Appl.* **13**, 362–375 (2020).
- 691 83. Moriarty, M. *et al.* Combining fisheries surveys to inform marine species distribution  
692 modelling. *ICES J. Mar. Sci.* (2020) doi:10.1093/icesjms/fsz254.
- 693 84. Fraser, H. M., Greenstreet, S. P. R. & Piet, G. J. Taking account of catchability in  
694 groundfish survey trawls: implications for estimating demersal fish biomass. *ICES J. Mar.*  
695 *Sci.* **64**, 1800–1819 (2007).
- 696 85. Walker, N. D., Maxwell, D. L., Le Quesne, W. J. F. & Jennings, S. Estimating  
697 efficiency of survey and commercial trawl gears from comparisons of catch-ratios. *ICES J.*  
698 *Mar. Sci. J. Cons.* fsw250 (2017) doi:10.1093/icesjms/fsw250.

- 699 86. Eriksen, E. *et al.* From single species surveys towards monitoring of the Barents Sea  
700 ecosystem. *Prog. Oceanogr.* **166**, 4–14 (2018).
- 701 87. Spedicato, M. T. *et al.* The MEDITS trawl survey specifications in an ecosystem  
702 approach to fishery management. *Sci. Mar.* **83**, 9–20 (2020).
- 703 88. Mendenhall, E. *et al.* Climate change increases the risk of fisheries conflict. *Mar.*  
704 *Policy* **117**, 103954 (2020).
- 705 89. Pershing, A. J. *et al.* Slow adaptation in the face of rapid warming leads to collapse of  
706 the Gulf of Maine cod fishery. *Science* **350**, 809–812 (2015).
- 707 90. Oremus, K. L. *et al.* Governance challenges for tropical nations losing fish species  
708 due to climate change. *Nat. Sustain.* 1–4 (2020) doi:10.1038/s41893-020-0476-y.
- 709 91. Vosooghi, S. Panic-Based Overfishing in Transboundary Fisheries. *Environ. Resour.*  
710 *Econ.* **73**, 1287–1313 (2019).
- 711 92. MILLER, K. A. & MUNRO, G. R. Climate and Cooperation: A New Perspective on the  
712 Management of Shared Fish Stocks. *Mar. Resour. Econ.* **19**, 367–393 (2004).
- 713 93. Aqorau, T., Bell, J. & Kittinger, J. N. Good governance for migratory species. *Science*  
714 **361**, 1208–1209 (2018).
- 715 94. VanderZwaag, D. L., Bailey, M. & Shackell, N. L. Canada–U.S. Fisheries  
716 Management in the Gulf of Maine: Taking Stock and Charting Future Coordinates in the  
717 Face of Climate Change. *Ocean Yearb. Online* **31**, 1–26 (2017).
- 718 95. Pentz, B., Klenk, N., Ogle, S. & Fisher, J. A. D. Can regional fisheries management  
719 organizations (RFMOs) manage resources effectively during climate change? *Mar. Policy*  
720 **92**, 13–20 (2018).
- 721 96. Scheffers, B. R. & Pecl, G. Persecuting, protecting or ignoring biodiversity under  
722 climate change. *Nat. Clim. Change* **9**, 581–586 (2019).
- 723 97. Miller, K. A., Munro, G. R., Sumaila, U. R. & Cheung, W. W. L. Governing Marine  
724 Fisheries in a Changing Climate: A Game-Theoretic Perspective: GOVERNING MARINE  
725 FISHERIES IN A CHANGING CLIMATE. *Can. J. Agric. Econ. Can. Agroeconomie* **61**,  
726 309–334 (2013).

- 727 98. Mason, N., Ward, M., Watson, J. E. M., Venter, O. & Runting, R. K. Global  
728 opportunities and challenges for transboundary conservation. *Nat. Ecol. Evol.* 1–8 (2020)  
729 doi:10.1038/s41559-020-1160-3.
- 730 99. United Nations General Assembly. Development of an international legally binding  
731 instrument under the United Nations Convention on the Law of the Sea on the  
732 conservation and sustainable use of marine biological diversity of areas beyond national  
733 jurisdiction. A/RES/69/292.  
734 [https://www.un.org/ga/search/view\\_doc.asp?symbol=A/RES/69/292&Lang=E](https://www.un.org/ga/search/view_doc.asp?symbol=A/RES/69/292&Lang=E) (2015).
- 735 100. Fletcher, R. *et al.* *Biodiversity Beyond National Jurisdiction: Legal options for a new*  
736 *international agreement.* (2017).
- 737 101. Pecl, G. T. *et al.* Redmap Australia: Challenges and Successes With a Large-Scale  
738 Citizen Science-Based Approach to Ecological Monitoring and Community Engagement  
739 on Climate Change. *Front. Mar. Sci.* **6**, 349 (2019).
- 740 102. Schade, S. *et al.* Aliens in Europe. An open approach to involve more people in  
741 invasive species detection. *Comput. Environ. Urban Syst.* **78**, 101384 (2019).
- 742 103. Salter, I., Joensen, M., Kristiansen, R., Steingrund, P. & Vestergaard, P.  
743 Environmental DNA concentrations are correlated with regional biomass of Atlantic cod in  
744 oceanic waters. *Commun. Biol.* **2**, 1–9 (2019).
- 745 104. Hughes, B. B. *et al.* Long-Term Studies Contribute Disproportionately to Ecology and  
746 Policy. *BioScience* **67**, 271–281 (2017).
- 747 105. Bianchi, G. Impact of fishing on size composition and diversity of demersal fish  
748 communities. *ICES J. Mar. Sci.* **57**, 558–571 (2000).
- 749 106. Bianchi, G. *et al.* Collaboration between the Nansen Programme and the Large  
750 Marine Ecosystem Programmes. *Environ. Dev.* **17**, 340–348 (2016).
- 751 107. Djupevåg, O. IMR bottom trawl data 1980-2017. (2018) doi:10.21335/NMDC-  
752 1657305299.

- 753 108. Swain, D. P., Benoît, H. P. & Hammill, M. O. Data from: Spatial distribution of fishes  
754 in a Northwest Atlantic ecosystem in relation to risk of predation by a marine mammal.  
755 2620101 bytes (2016) doi:10.5061/DRYAD.N43QF.
- 756 109. Kidé, S. O., Manté, C., Dubroca, L., Demarcq, H. & Mérigot, B. Spatio-Temporal  
757 Dynamics of Exploited Groundfish Species Assemblages Faced to Environmental and  
758 Fishing Forcings: Insights from the Mauritanian Exclusive Economic Zone. *PLOS ONE*  
759 **10**, e0141566 (2015).
- 760 110. Payne, M. R. *et al.* Lessons from the First Generation of Marine Ecological Forecast  
761 Products. *Front. Mar. Sci.* **4**, (2017).
- 762 111. Thorson, J. T. Forecast skill for predicting distribution shifts: A retrospective  
763 experiment for marine fishes in the Eastern Bering Sea. *Fish Fish.* **20**, 159–173 (2019).
- 764 112. Young, T. *et al.* Adaptation strategies of coastal fishing communities as species shift  
765 poleward. *ICES J. Mar. Sci.* **76**, 93–103 (2019).
- 766 113. Hilborn, R., Maguire, J.-J., Parma, A. M. & Rosenberg, A. A. The Precautionary  
767 Approach and risk management: can they increase the probability of successes in fishery  
768 management? *Can. J. Fish. Aquat. Sci.* **58**, 99–107 (2001).
- 769 114. Golden, C. D. *et al.* Nutrition: Fall in fish catch threatens human health. *Nature* **534**,  
770 317–320 (2016).
- 771 115. FAO. *Report of the Norway-FAO Expert Consultation on the Management of Shared*  
772 *Fish Stocks.* (2002).
- 773 116. Hønneland, G. Norway and Russia: Bargaining Precautionary Fisheries Management  
774 in the Barents Sea. *Arct. Rev.* **5**, (2014).
- 775 117. Ranke, W. *Co-operative Fisheries Management Issues in the Baltic Sea.* 123–32  
776 <http://www.fao.org/3/y4652e/y4652e0a.htm> (2003).  
777  
778

## 779 Acknowledgments

780 We thank all persons who have collected the survey data around the world. We are also  
781 grateful to everyone who answered our emails and provided contacts, expertise and  
782 guidance on survey existence and status: Abdul Wahab Abdullah, Daniela Alemany, Valérie  
783 Allain, Denis Bernier, Arnaud Bertrand, Philippe Bouchet, José Miguel Casas, George  
784 Daskalov, Andrey V. Dolgov, Bernadine Everett, Louise Flensburg, Bertrand Richer de  
785 Forges, Elizabeth Fulton, Carolina Giraldo, Donald R. Kobayashi, Teoh Shwu Jiau, Michel  
786 Kulbicki, Marc Léopold, Rich Little, Franck Magron, David Mills, Sten Munch-Petersen, J.  
787 Rasmus Nielsen, Daniel Pauly, Gretta Pecl, Cohen Philippa, Raul Primicerio, Romeo  
788 Saldívar-Lucio, Nicolas Rolland, Sarah Samadi, Jörn Schmidt, Kwang-Tsao Shao, Andrew  
789 Smith, Alex Tilley, Stephanie Turner, Vincent Vallée, Francisco Velasco, Laurent Vigliola and  
790 Manuel J. Zetina-Rejón. We thank Inês Dias Bernardes for providing the bottom trawl survey  
791 metadata from the Nansen Program. We thank the International Council for the Exploration  
792 of the Sea (ICES) for providing the space to organize side-meetings during the Annual  
793 Science Conference (Göteborg, Sweden, 2019), at the origin of this project. Aurore  
794 Maureaud received funding from Villum research grant awarded to Martin Lindegren (No.  
795 13159) and conducted the work within the Centre for Ocean Life, a Villum Kann Rasmussen  
796 Center of Excellence supported by the Villum Foundation. We further thank National Institute  
797 of Fisheries Science (R2020021) for providing the Korean trawl survey data. The scientific  
798 results and conclusions, as well as any views or opinions expressed herein, are those of the  
799 author(s) and do not necessarily reflect those of NOAA or the Department of Commerce.  
800 The EU NAFO data used in this paper have been funded by the EU through the European  
801 Maritime and Fisheries Fund (EMFF) within the National Program of collection, management  
802 and use of data in the fisheries sector and support for scientific advice regarding the  
803 Common Fisheries Policy.

804

805

## 806 Author contributions

807 A.M., R.F., L.P., N.S. and J.T. designed the project, directed and performed the data  
808 collection and analyses. A.M. was leading the project and R.F. was leading the data  
809 curation. J.T. produced the code and ran the model to estimate density of species with  
810 multiple surveys. R.F., J.T. and A.M. produced figures and conducted analyses. All authors  
811 have either provided metadata, provided contact lists and/or lists of surveys to help  
812 collecting the metadata, conducted metadata requests and/or helped with the interpretation  
813 of results. A.M. wrote the first draft of the manuscript and all co-authors were given the  
814 opportunity to revise it.

815

## 816 Competing interests

817 The authors declare no competing interests.

818

## 819 Figure Legends

820 **Figure 1:** Worldwide availability of bottom trawl surveys, classified as follows: *publicly*  
821 *available* (blue), *partly publicly available* (orange), *available upon request* (purple), *not*  
822 *publicly available* (red), *incomplete metadata* (black) and *unavailable metadata* (dark grey for  
823 countries conducting the survey). **a**, Location of ongoing scientific bottom trawl surveys,  
824 represented by the survey convex hull. Surveys are classified according to their availability.  
825 Additional visualizations are available in Supplementary 4. **b**, number of samples for 2001-  
826 2019 and availability across continents. (c) Relative availability of samples across  
827 continents.

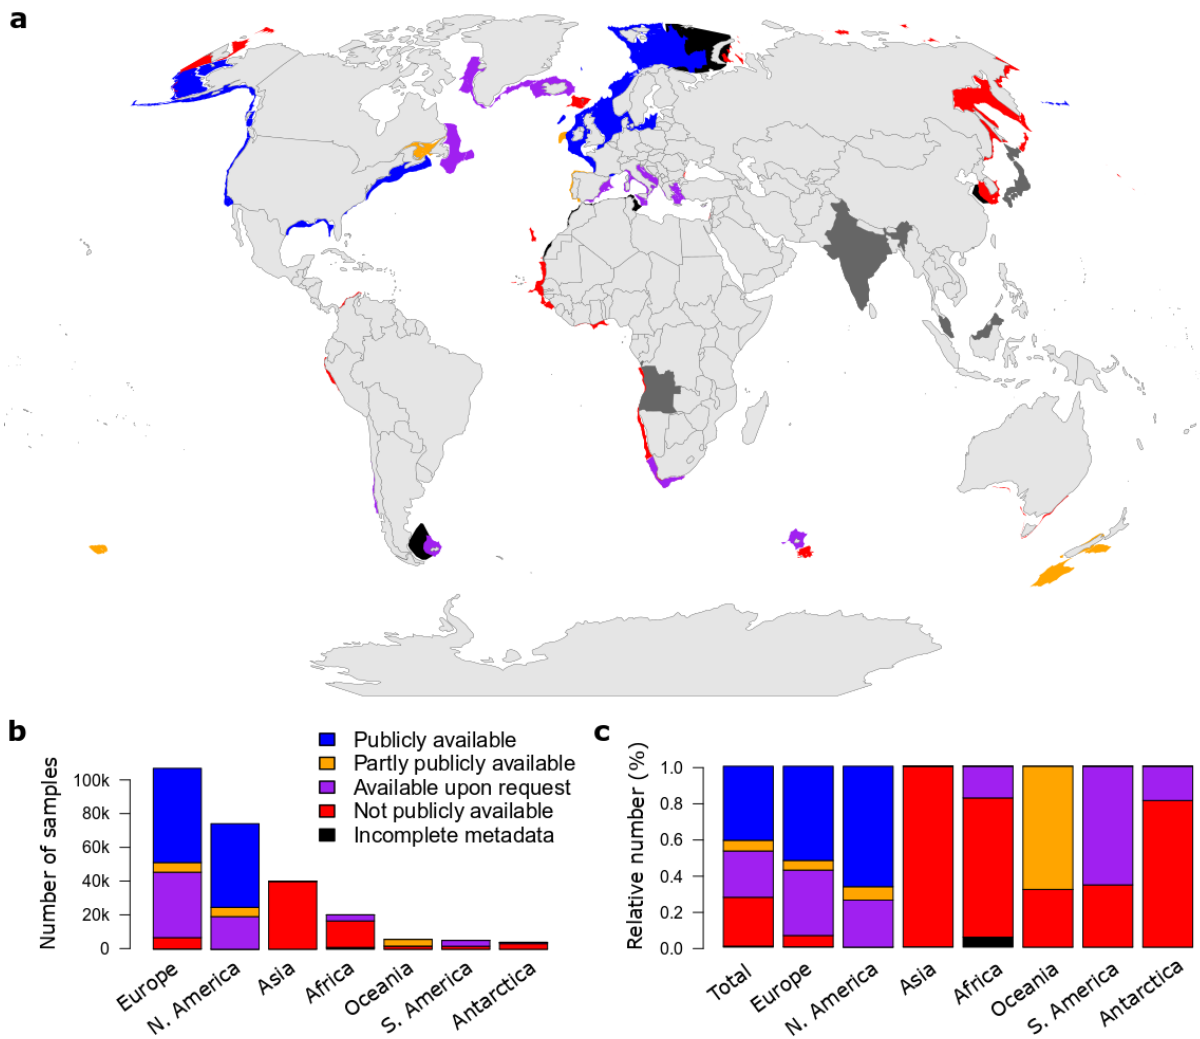

828

829 **Figure 2:** Main commercial demersal species identified by the ASFIS 3-letter codes and the  
 830 corresponding coverage by the surveys: **a**, proportion of AquaMaps habitat covered by the  
 831 surveys (the vertical dotted line indicates 50% of range covered) and **b**, number of surveys  
 832 behind the proportion covered (species for which less than 50% of range covered are  
 833 shaded). Corresponding Latin names to species are available in Supplementary Table 5.1.  
 834 Colors indicate the availability status attributed to each survey.

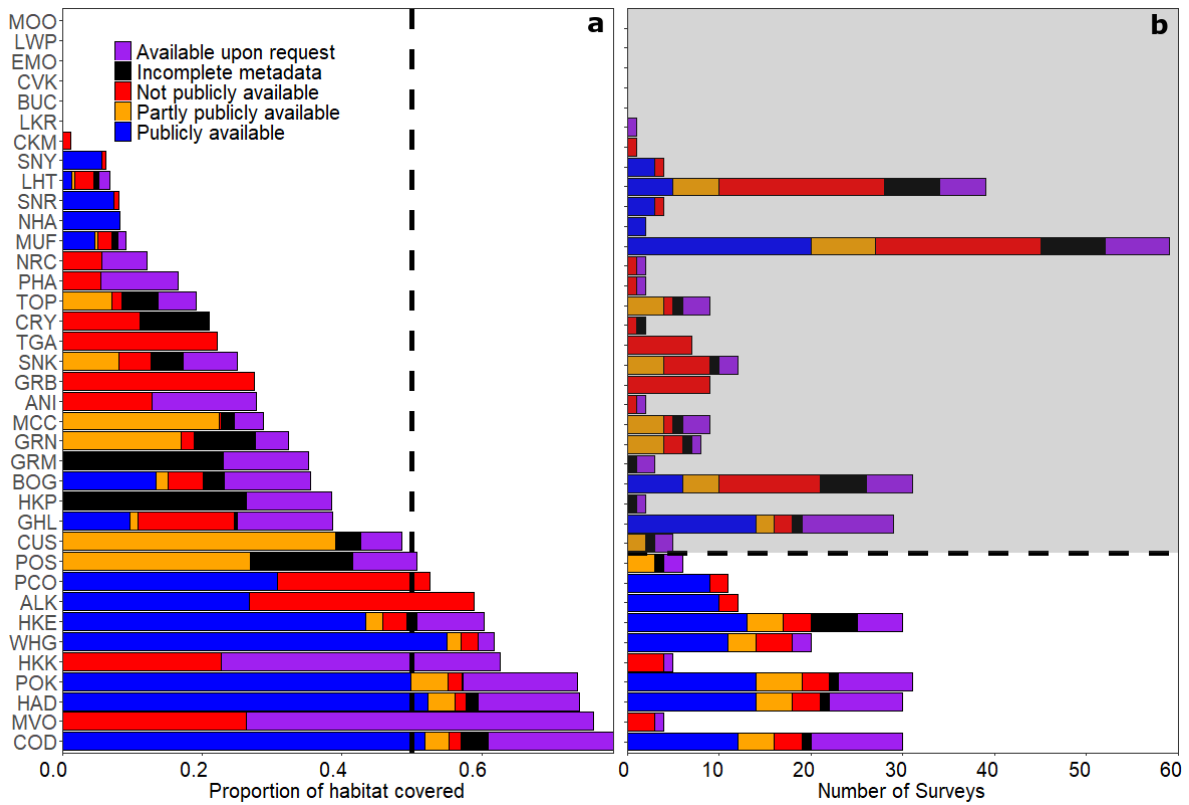

835

836



837 **Figure 3:** Density estimates for arrowtooth flounder (*Atheresthes stomias*) along the  
838 northeastern Pacific coast containing contiguous sampling data from multiple surveys in  
839  $\log(\text{kg}/\text{km}^2)$  using regional bottom trawl surveys: West Coast US (WCANN), West Coast  
840 Vancouver Island (WCVI), Hecate Strait (HS), West Coast Haida Gwaii (WCHG), Queen  
841 Charlotte (WCS), Gulf of Alaska (GOA), eastern Bering Sea (EBS), northern Bering Sea  
842 (NBS), Aleutian Islands (AI), and Bering Sea slope (BSS). Polygon contours represent the  
843 different surveys, as indicated by the corresponding codes. Densities are presented for three  
844 years: **a** 2001, **b** 2009 and **c** 2018. Only densities higher than 0.1% of the maximum were  
845 selected to clearly differentiate areas occupied by the species (colored-coded) from those  
846 mostly unoccupied (white). The inset in the bottom panel shows the change in the center of  
847 gravity through time, where longitude and latitude for 2001 are (0;0).

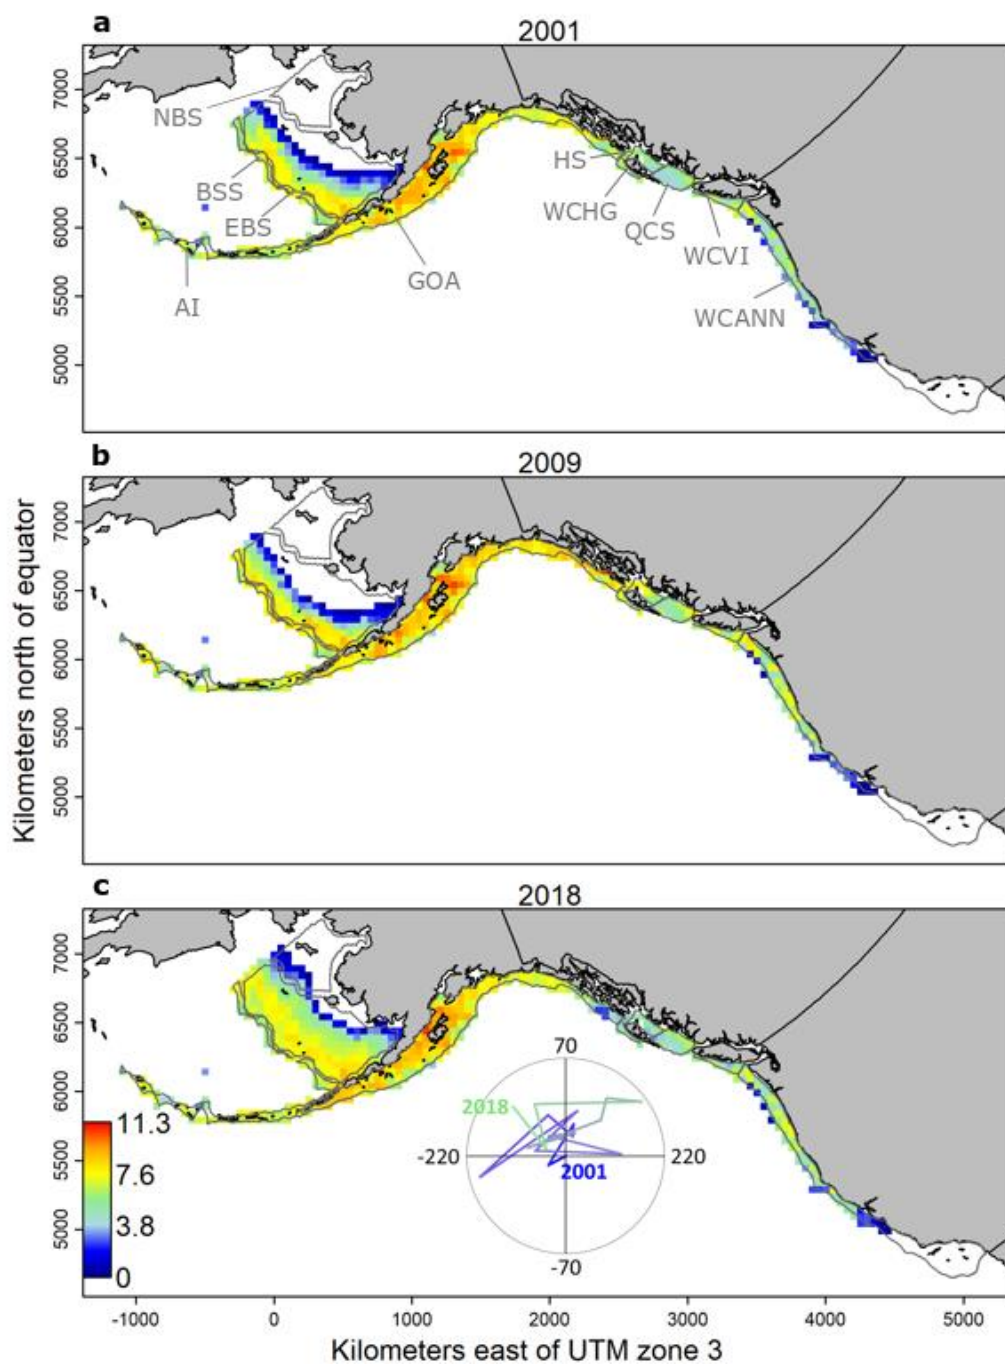

848

849

850 **Box 1. Applying open science principles to bottom trawl survey data.**

851 Open Science is broadly defined as “Open data and content that can be freely used,  
852 modified, and shared by anyone for any [ethical] purpose” (<http://opendefinition.org/>), and is  
853 more specifically described by six main principles (see ref <sup>39</sup> for a general description).  
854 Following is a summary of advances towards Open Science and challenges regarding the  
855 use of bottom trawl surveys.

856

857 **1. Ensure ethical use of shared information**

858 It is crucial that the push towards open science recognizes the value and human side of  
859 information. Nations and communities, particularly those that have been historically exploited  
860 must be able to benefit from their own data and be able to control their own information to  
861 minimize potential abuse. Open science must ensure that open data do not enable an  
862 opportunistic fishing company to exploit a nation’s or community’s resources. While open  
863 science can promote transparent science and understanding, it is essential that any use of  
864 open data give priority, proper credit, acknowledgement and potentially compensation to  
865 those who collected the information, paid for collection and recognize the nation where the  
866 data were collected. Access to data from economically stressed nations may require some  
867 type of compensation to ensure the data continue to be collected and made available.

868

869 **2. Improve knowledge on existing trawl surveys (“Open resources”)**

870 Knowledge about the existence of a survey and about the essential course of actions to  
871 request and access the survey data can be a challenge. This could be facilitated through a  
872 network or a platform where scientists can share such relevant information. Regional  
873 platforms currently exist in some areas: western Africa (<http://www.projet-istam.org/>;  
874 <http://pescao-demerstem.org/>), southeast Asia<sup>30</sup>, Europe (<https://datras.ices.dk/>) and North  
875 America (<https://oceanadapt.rutgers.edu>). Such platforms would ideally improve the visibility  
876 of their resources by making their metadata available and easily visible. Here, we  
877 established a global network for open resources regarding bottom trawl surveys, where

878 metadata of surveys and contacts or links to access full data are provided (Supplementary  
879 Table 1.1 and <https://rrelat.shinyapps.io/metabts/>). The difficulty in obtaining survey  
880 metadata and accessing it suggests that challenges remain to create an exhaustive global  
881 resource for bottom trawl surveys that can be maintained on the medium and long term.

882

### 883 **3. Improve the accessibility and availability of surveys (“Open data”)**

884 An evaluation of the accessibility and availability of surveys is necessary to enhance further  
885 open data science. We assessed that 59% of the samples collected are not publicly  
886 available to varying degrees (Figure 1). The network created here greatly improves the  
887 visibility of surveys, by presenting their metadata. Further, the availability of data can only be  
888 improved by changing the way we share scientific information, for instance by publishing  
889 data<sup>52</sup> and ensuring quality-controlled use of data. Several bottom trawl surveys are  
890 published online, but the most recent years are not always included, or links to access the  
891 data are not always maintained, e.g. the Norwegian surveys<sup>107</sup>, the southern Gulf of St  
892 Lawrence survey<sup>108</sup>, Mauritania<sup>109</sup>, southeast Asian surveys<sup>30</sup>. Ensuring online publication of  
893 data are updated and maintained is key, as is done for other repositories (e.g. DATRAS from  
894 the International Council for the Exploration of the Sea <https://datras.ices.dk/>). Existing  
895 platforms that enable online data publication, however, may not always allow updating or  
896 involve peer-review of the data (e.g. PANGAEA <https://www.pangaea.de/> and DRYAD  
897 <https://datadryad.org/stash>). To ensure data are available beyond a single report or  
898 publication, a dedicated, sustainable, long-term management strategy is required with  
899 dedicated personal. The data repositories mentioned above that update and maintain their  
900 information all have dedicated programs and resources to ensure the data are available.

901

### 902 **4. Improve the visibility of the expertise on surveys (“Open source” and “Open 903 methods”)**

904 To ensure appropriate use of the data, it is highly important that survey protocols, reports,  
905 and common practices are shared together with the raw survey data. Furthermore, providing

906 example code to clean the data or to combine data from multiple surveys can ensure the  
907 appropriate use of data. Such types of open source and open access methods have been  
908 developed in recent years, mostly for Europe and North America (for instance  
909 <https://oceanadapt.rutgers.edu/>; <https://james-thorson.github.io/> for codes;  
910 <https://datras.ices.dk/> and ref <sup>72</sup> for codes and published reports). However, such  
911 documentation and tools need to be available and easy to find beyond Europe and North  
912 America, as well as in multiple languages. Together with the survey metadata information,  
913 we started gathering such information (see Supplementary Table 1.1).

914

#### 915 **5. Open access of the produced research (“Open access”, “Open peer review”)**

916 The research published based on bottom trawl surveys can be open access, even when the  
917 raw underlying data are not (see ref <sup>47</sup> for an example). The accessibility of published papers  
918 in science is improving, but is undermined by journals charging high costs for open access,  
919 which is particularly prejudicing open publications in low and middle-income countries. Open  
920 peer review is developing in several journals and will also increase transparency towards  
921 publishing. Similarly, providing programming code and the underlying data are increasingly  
922 required for publishing, thereby also enhancing open science.

923

924

925 **Box 2. Towards a framework for transboundary management and conservation**

926  
927 **1. Agreement of Survey Data and Analyses.** All parties must agree on data, information,  
928 current abundance and spatial footprint of the fisheries stock and species of interest.

929 a. Find the surveys covering the species range

930 The first key task is to establish which surveys cover the native range of the species of  
931 interest. The next task is to find and access surveys corresponding to that species native  
932 range. A list of existing surveys, their time coverage and available samples are available  
933 here for demersal species (see Supplementary Table 1.1). If surveys are not publicly  
934 available, one can use the network of contacts published in this paper and/or establish  
935 bilateral/multilateral agreements to gain access to the survey data. Metadata should also  
936 ideally include a list of species recorded in the surveys.

937 b. Estimate the change in species density and distribution

938 Surveys vary in terms of design, gear, catchability and sampling methods. Multiple surveys  
939 can be combined to estimate species density and reconstruct past temporal changes in  
940 spatial distribution. Modeling the change in species distributions can be done with multiple  
941 models and needs to take into account survey discrepancies<sup>76-79</sup>. Sharing information across  
942 international boundaries could enable a more complete picture of the distribution of a fish  
943 population and reconsideration of the definition of their stock structure.

944 c. Forecast changes in densities and distributions

945 Building on the knowledge of past species distribution change and ecology, forecasting  
946 species distribution will enable adaptation to changes in advance<sup>110</sup>. The spatio-temporal  
947 model described here can also be used to forecast species distributions in the near future<sup>111</sup>,  
948 and thus the spatial scale at which adaptation measures should be applied.

949 d. Measure ecosystem impact in local management areas

950 Climate change enhances the dynamic nature of changes in species abundance and  
951 requires fisheries management to adapt, not only directly to the resource, but also to assess

952 the impacts on port infrastructure, fishing fleets/gears and other human activities<sup>20,22,112</sup>. The  
953 immigration/emigration of species into local areas can lead to substantial changes in  
954 community structure and diversity, and may lead other species to outcompete or be  
955 outcompeted. By monitoring not only commercial species, but the entire community—as is  
956 generally possible with bottom trawl surveys—we can understand ecological changes and  
957 inform the conservation of vulnerable species<sup>17,96</sup>.

958

## 959 **2. Management and cooperation.**

### 960 a. International agreements

961 All parties must create a management agreement for the regulation of the resource that is  
962 legally binding, regardless of how the distribution or abundance of the resource might  
963 change or not change in the future. Policies could be developed within the agreement to  
964 adjust regulations depending on a range of future scenarios such as when stocks move  
965 poleward, or decrease/increase in abundance. Pre-agreements covering a range of options  
966 can help reduce future conflicts and reduce the need to renegotiate or abandon the  
967 agreement<sup>113</sup>. An important goal of the management agreement is to acknowledge that  
968 changes are likely to occur, while recognizing that the specific change is likely unpredictable.

### 969 b. Transboundary cooperation

970 In the case of transboundary species and distribution over multiple management areas,  
971 changes in spatial distribution under climate change and variability may favor/exclude  
972 countries or regions<sup>90,114</sup>. Therefore, some areas will ‘win’ or ‘lose’ and create conflicts and/or  
973 lead to species overexploitation<sup>24,88</sup>. Building agreements among countries to share  
974 resources equitably—or compensate when not possible—is necessary to ensure the  
975 sustainability of resources and the dependent human communities<sup>92</sup>. It is essential that all  
976 parties perceive benefit from cooperating and remaining within the agreement. In the case of  
977 non-exploited/non-targeted species, cooperative conservation actions should be established.  
978 Such cooperation can only be built with open and transparent science (Box. 1) to conserve  
979 the species and avoid conflicts.

980 c. Regulation and enforcement

981 To truly implement transboundary management and conservation, the involved parties must  
982 develop a method to enforce their agreement. Effective monitoring to gather information on  
983 the shared resource and to measure compliance is important. Compensation and/or  
984 penalties may also be involved to ensure all parties adhere to the regulations. Side  
985 payments are one means of compensation that can take different forms<sup>92</sup>. Direct cash  
986 payments are possible, however countries can also share monitoring and research capacity  
987 across international boundaries as is done for a number of stocks that straddle Canadian  
988 and United States waters<sup>92</sup>. Nations can allow other nations to fish for a specific shared  
989 resource in their EEZ as is done between Norway and Russia<sup>115,116</sup> or swap quota in a  
990 multispecies fishery as has been done in the Baltic<sup>117</sup>. Once again, the goal is to develop an  
991 agreement in which all parties perceive benefits to properly manage shared stocks.

992
